# Supplementary material for: Confirming the Molecular Basis of the Solvent Extraction of Cadmium(II) Using 2-Pyridyl Oximes through a Synthetic Inorganic Chemistry Approach and a Proposal for More Efficient Extractants
Source: MDPI journal article supplement (doi:10.3390/molecules27051619), 2022-02-28
Supplement: s1 [file s1]

## *Supplementary materials to*

# **Confirming the Molecular Basis of the Solvent Extraction of Cadmium(II) using 2-pyridyl Oximes through a Synthetic Inorganic Chemistry Approach and a Proposal for more Efficient Extractants**

**Anastasia Routzomani <sup>1</sup>, Zoi G. Lada <sup>1,2</sup>, Varvara Angelidou <sup>1</sup>, Catherine P. Raptopoulou <sup>3</sup>, Vassilis Psycharis <sup>3,\*</sup>, Konstantis F. Konidaris <sup>4,\*</sup>, Christos T. Chasapis <sup>2,5,\*</sup> and Spyros P. Perlepes <sup>1,2,\*</sup>**

<sup>1</sup> Department of Chemistry, University of Patras, 265 04 Patras, Greece; a.routzomani@gmail.com (A.R.); varvara\_angelidou@hotmail.com (V.A.)

<sup>2</sup> Institute of Chemical Engineering Sciences (ICE-HT), Foundation for Research and Technology-Hellas, (FORTH), Platani, P.O. Box 1414, 265 04 Patras, Greece; zoilada@iceht.forth.gr (Z.G.L.)

<sup>3</sup> Institute of Nanoscience and Nanotechnology, NCSR "Demokritos", 153 10 Aghia Paraskevi Attikis, Greece; c.raptopoulou@inn.demokritos.gr

<sup>4</sup> Department of Science and High Technology and INSTM, University of Insubria, 22 100 Como, Italy

<sup>5</sup> NMR Facility, Instrumental Analysis Laboratory, School of Natural Sciences, University of Patras, 265 04 Patras, Greece

\* Correspondence: v.psycharis@inn.demokritos.gr (V.P.); konstantis.konidaris@uninsubria.it (K.F.K.); cchasapis@upatras.gr (C.T.C.); perlepes@patreas.upatras.gr (S.P.P.); Tel.: +30 2610996730 (S.P.P.); +30 2610 996261 (C.T.C.); +39 0312386472 (K.F.K.); +30 2106503346 (V.P.)

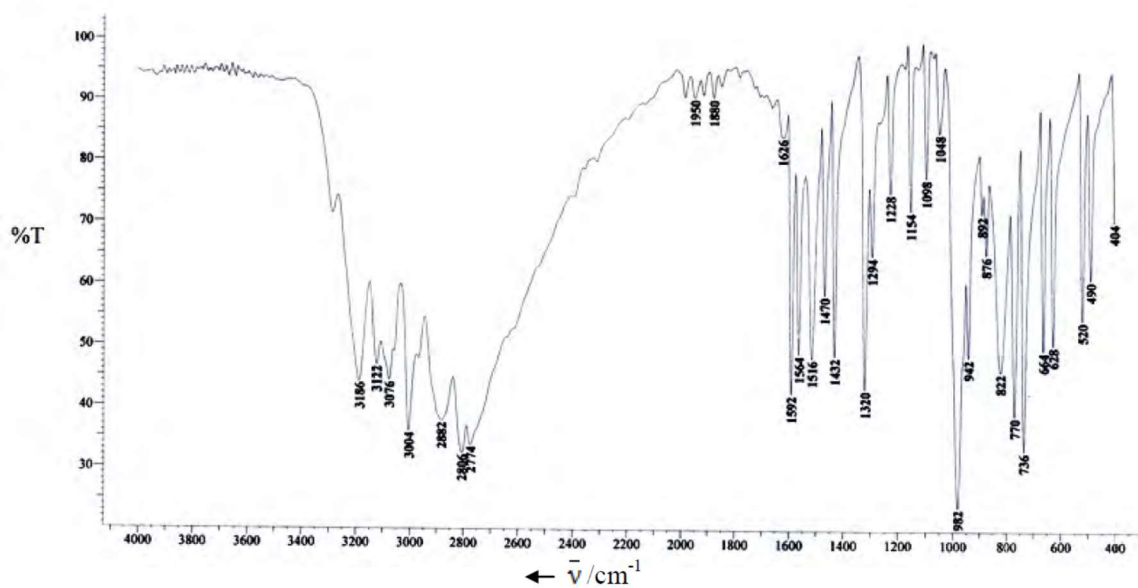

**Figure S1.** The FT-IR spectrum ( $\text{KBr}/\text{cm}^{-1}$ ) of free paoH.

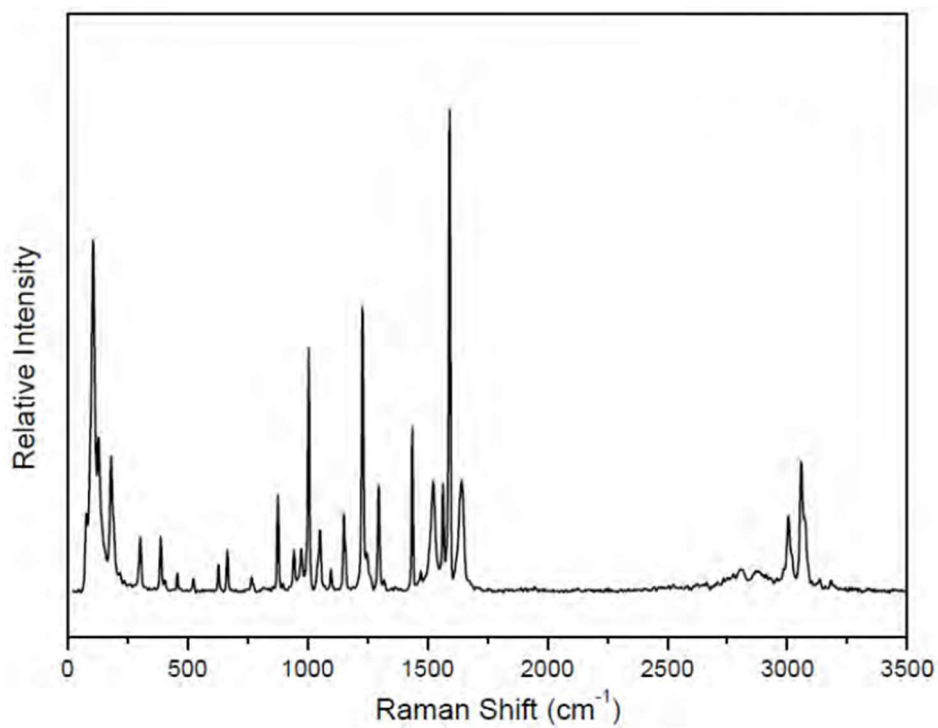

**Figure S2.** The FT-Raman spectrum of free paoH.

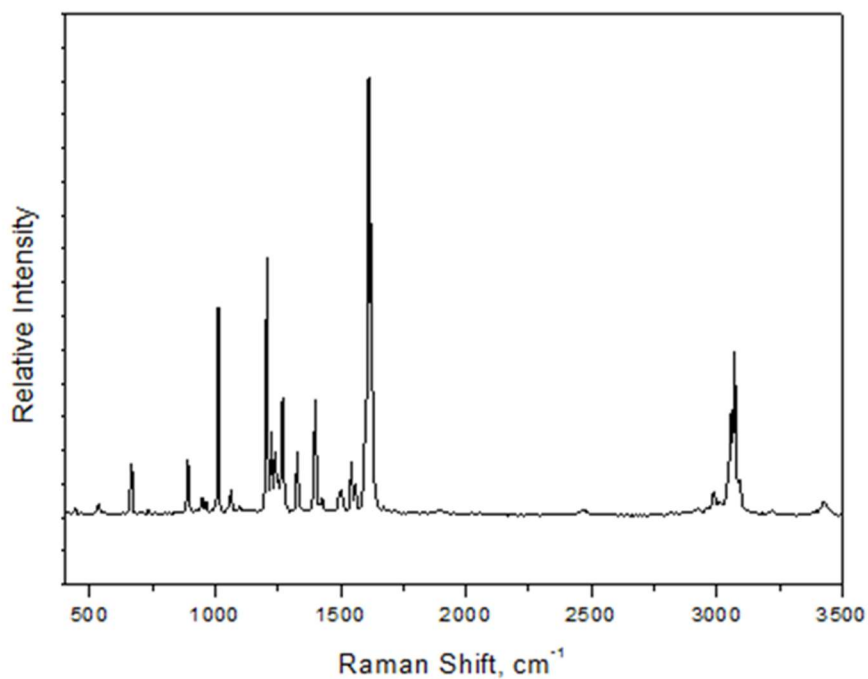

**Figure S3.** The FT-Raman spectrum of  $\{[\text{CdI}_2(4\text{paoH})_2]\}_n$  (**3**).

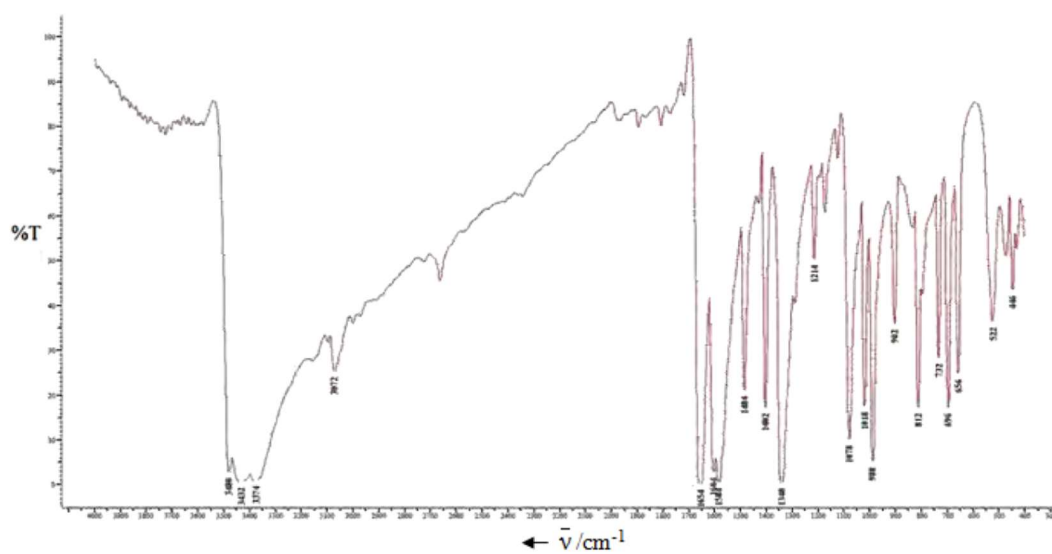

**Figure S4.** The FT-IR spectrum ( $\text{KBr}/\text{cm}^{-1}$ ) of compound  $[\text{CdI}_2(\text{LH}_4)]$  (**5a**).

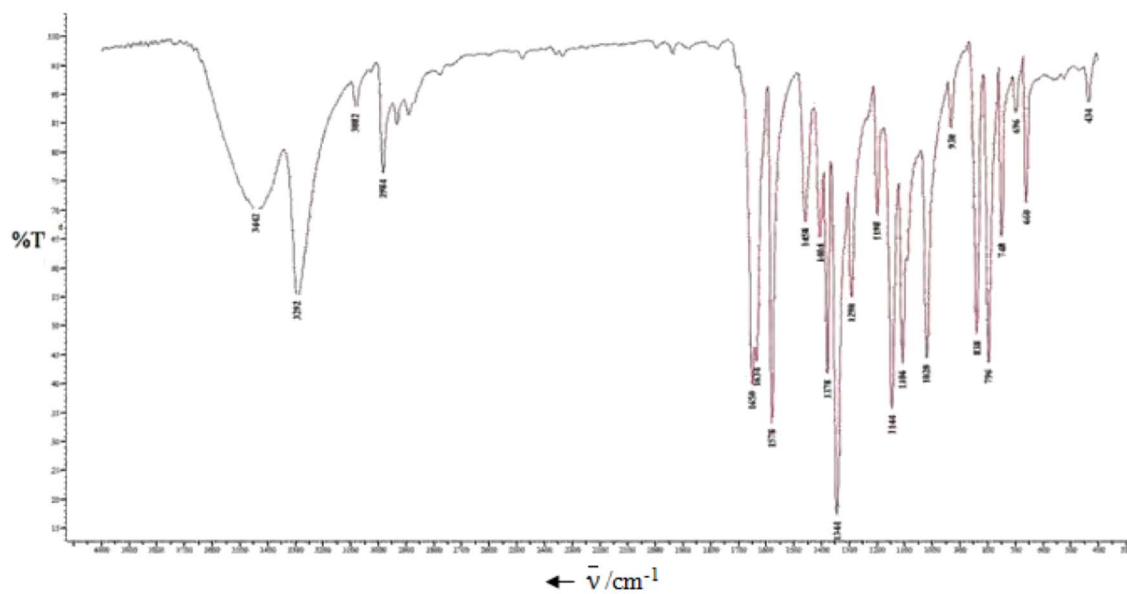

**Figure S5.** The FT-IR spectrum (KBr/cm<sup>-1</sup>) of complex [CdI<sub>2</sub>(L'H)<sub>2</sub>] (5).

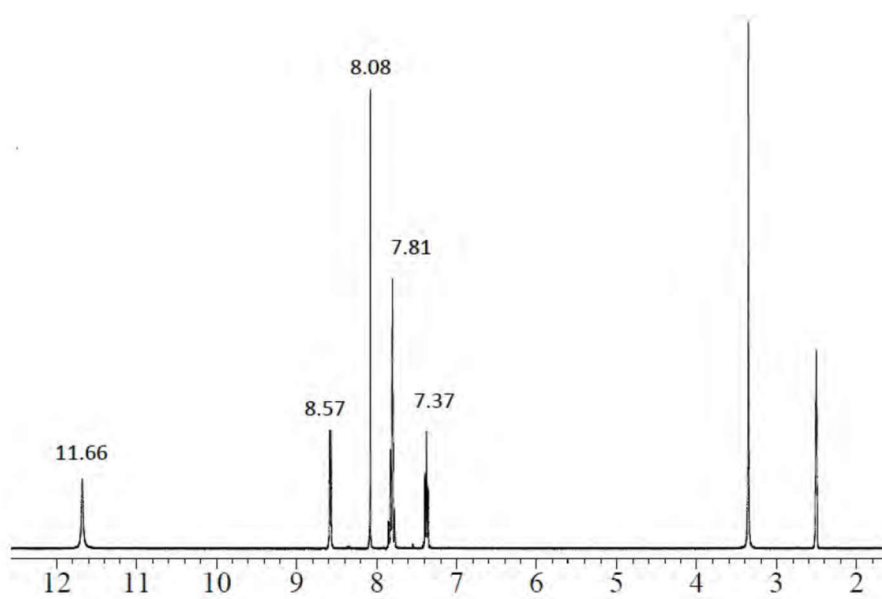

**Figure S6.** The <sup>1</sup>H NMR spectrum (δ/ppm) of the free ligand 2paoH in d<sub>6</sub>-DMSO.

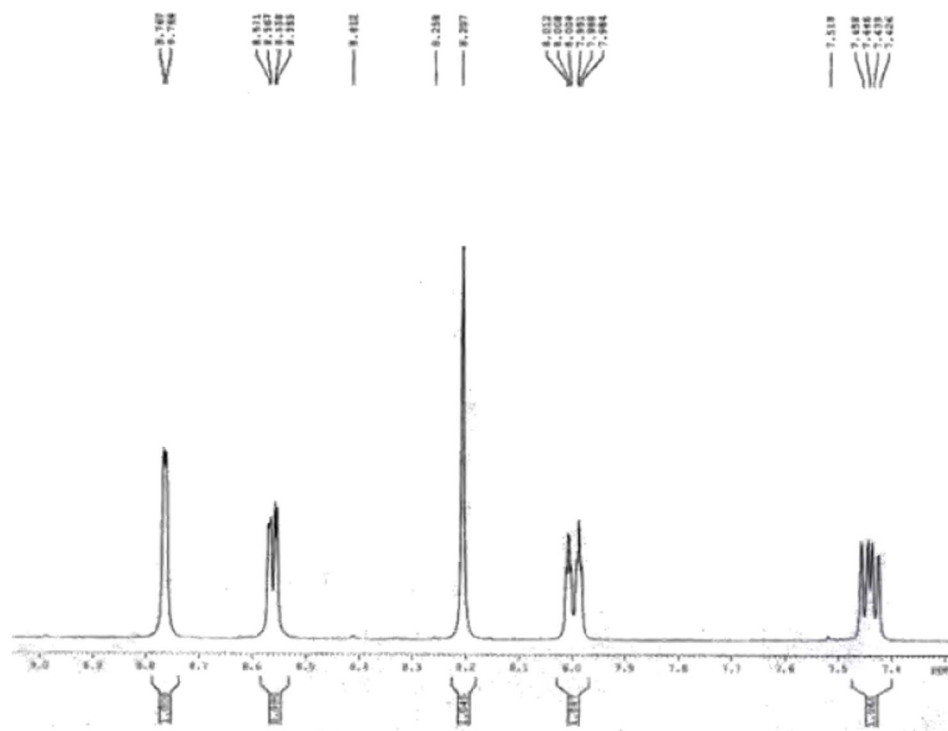

**Figure S7.** The  $^1\text{H}$  NMR spectrum ( $\delta$ /ppm) of complex  $\{[\text{CdI}_2(3\text{paoH})]\}_n$  (2) in  $d_6$ -DMSO in the 9.0-7.33 ppm region.

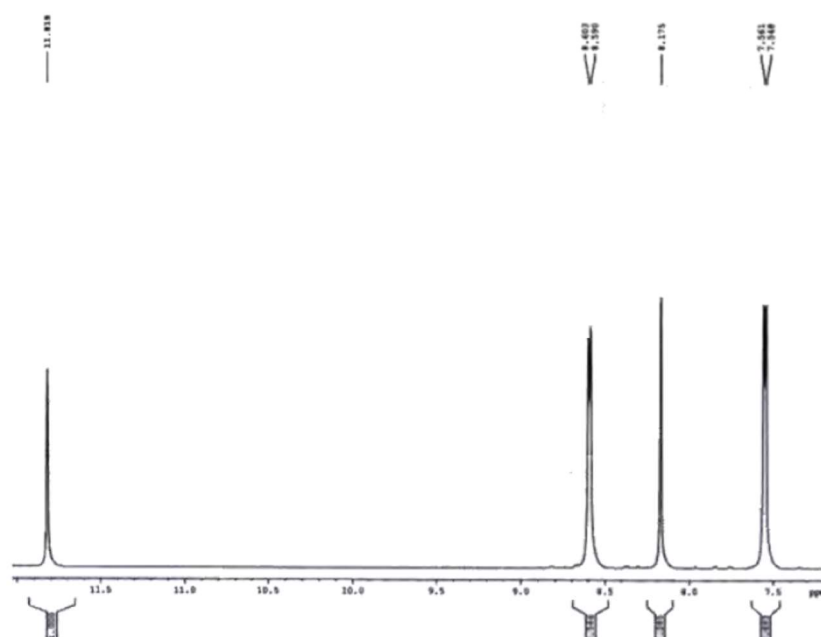

**Figure S8.** The  $^1\text{H}$  NMR spectrum ( $\delta$ /ppm) of compound  $\{[\text{CdI}_2(4\text{paoH})_2]\}_n$  (3) in  $d_6$ -DMSO in the 12.0-7.3 ppm region.

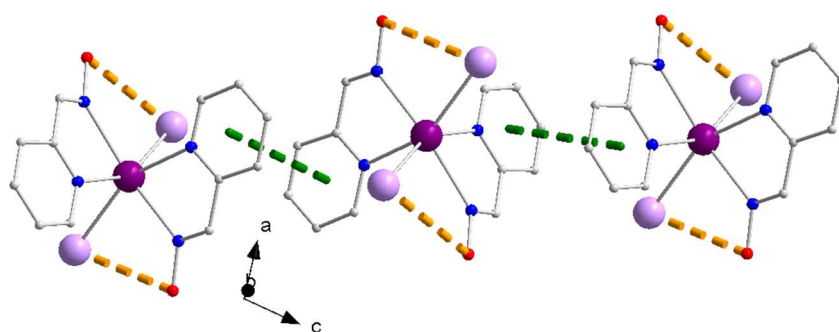

**Figure S9.** A portion of one chain, parallel to the crystallographic direction [101], in the crystal structure of  $[\text{CdI}_2(2\text{paoH})_2]$  (**1**). The thick dashed orange and green lines represent the intramolecular  $\text{O1-H(O1)}\cdots\text{I1}'$  and  $\text{O1'-H(O1')}\cdots\text{I1}$  hydrogen bonds [ $(') = -x, y, -z+1/2$ ] and the  $\pi$ - $\pi$  interactions, respectively.

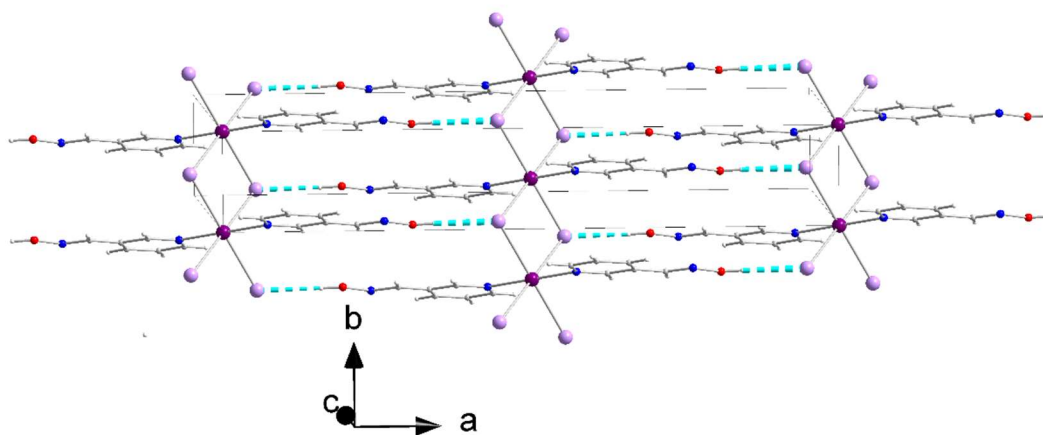

**Figure S10.** Layers of chains parallel to the (110) plane in the crystal structure of  $\{[\text{CdI}_2(3\text{paoH})_2]\}_n$  (**2**). The layers are formed through  $\text{O-H}\cdots\text{I}$  hydrogen bonds (thick dashed cyan lines); see text for more details.

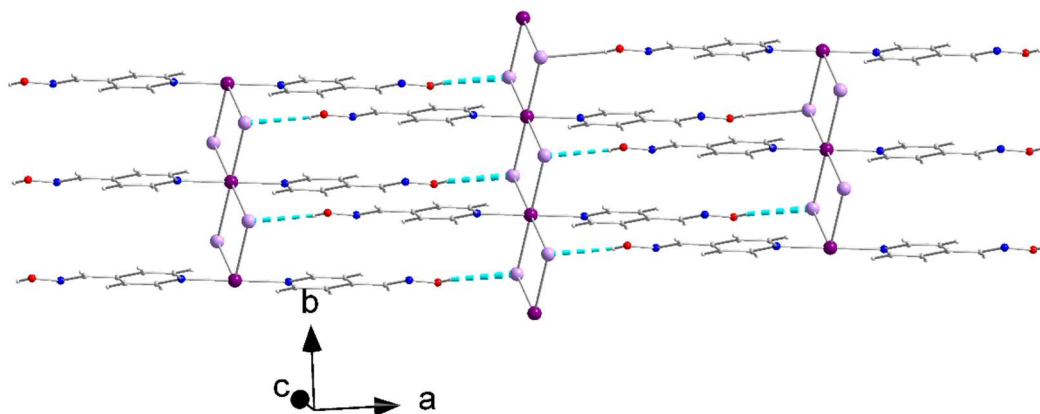

**Figure S11.** Layers of chains parallel to the (110) plane in the crystal structure of  $\{[\text{CdI}_2(4\text{paoH})_2]\}_n$  (**3**). The layers are formed through  $\text{O-H}\cdots\text{I}$  hydrogen bonds (thick dashed cyan lines); see text for the metric parameters.

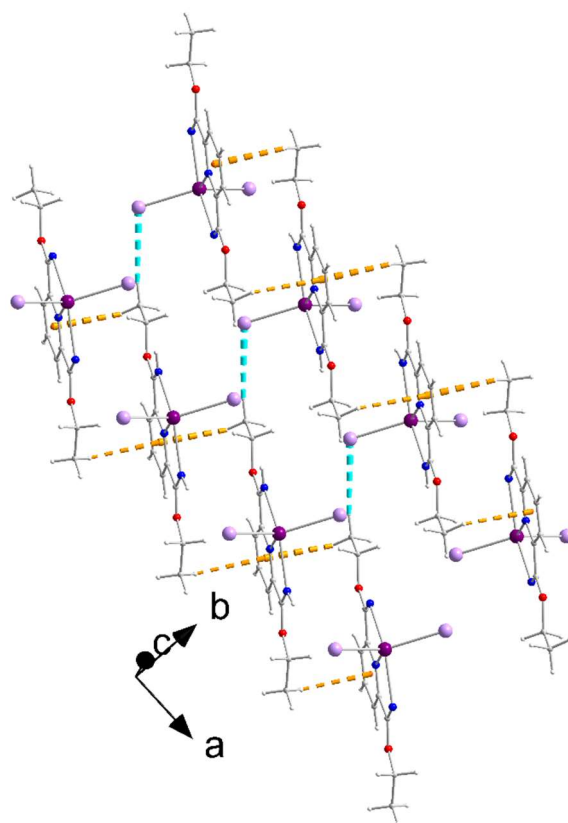

**Figure S12.** Formation of chains parallel to the *a* axis and layers parallel to the (001) crystallographic plane in the crystal structure of complex  $[\text{CdI}_2(\text{L}'\text{H}_2)]$  (5). The dashed thick orange line and the cyan lines represent the C(methyl)-H $\cdots\pi$  and C(methyl)-H $\cdots\text{I}$  interactions; see Table S2 for metric parameters.

**Table S1.** Hydrogen bonding interactions ( $\text{\AA}$ , deg) in the crystal structure of  $[\text{CdI}_2(\text{dapdoH}_2)] \cdot 2\text{EtOH}$  ( $42\text{EtOH}$ ).<sup>a</sup>

| D—H $\cdots$ A        | d(D $\cdots$ A) | d(D $\cdots$ H) | d(H $\cdots$ A) | $\angle\text{DHA}$ | Symmetry Code of A |
|-----------------------|-----------------|-----------------|-----------------|--------------------|--------------------|
| O1—H(O1) $\cdots$ O4  | 2.614 (4)       | 0.84            | 1.79            | 168                | $x, y, z$          |
| O2—H(O2) $\cdots$ O3  | 2.622 (3)       | 0.84            | 1.82            | 158                | $x, y, z$          |
| C4—H(C4) $\cdots$ I2  | 3.889 (3)       | 0.95            | 3.08            | 144                | $-x, -y+2, -z+2$   |
| C9—Hc(C9) $\cdots$ O2 | 3.440 (4)       | 0.98            | 2.54            | 152                | $-x+1, -y+1, -z+2$ |

<sup>a</sup> For more details, see text. D= donor; A= acceptor.

**Table S2.** Hydrogen bonding interactions ( $\text{\AA}$ , deg) in the crystal structure of  $[\text{CdI}_2(\text{L}'\text{H}_2)]$  (5).

| D—H $\cdots$ A                      | d(D $\cdots$ A) | d(D $\cdots$ H) | d(H $\cdots$ A) | $\angle\text{DHA}$ | Symmetry Code of A |
|-------------------------------------|-----------------|-----------------|-----------------|--------------------|--------------------|
| C1—Ha(C1) $\cdots$ I1               | 4.143(6)        | 0.98            | 3.17            | 171                | $-x+1, -y+1, -z+1$ |
| C1—Hc(C1) $\cdots$ Cg1 <sup>a</sup> | 3.721(6)        | 0.98            | 2.95            | 136                | $x+1, y, z$        |

<sup>a</sup> Cg1 is the centroid of the ring N2C4C5C6C5' C4' [ $(') = -x, -y+3/2, z$ ]. D= donor; A= acceptor.
